# Supplementary material for: NGS-Trex: Next Generation Sequencing Transcriptome profile explorer
Source: PubMed Central journal article supplement (PMC3633008; doi:10.1186/1471-2105-14-s7-s10), 2013-04-22
Supplement: 1471-2105-14-S7-S10-S1.pdf [file 1471-2105-14-S7-S10-S1.pdf]

Supplementary Table 1

\* count expressed as reads per million (rpm)

\*\* when no reads were identified in RNA-seq from one of the cell lines "0" was replaced by "1"

reads count in "NGS-Trex G+T" and "NGS-Trex T" panels are absolute and when no reads were identified in RNA-seq from one of the cell lines the fold change is "nd"

| Gene Name | Carraro et al. |        |                |              | NGS-Trex G+T |      |             |           |            | NGS-Trex T |      |             |           |            |
|-----------|----------------|--------|----------------|--------------|--------------|------|-------------|-----------|------------|------------|------|-------------|-----------|------------|
|           | C5.2 *         | Hb4a * | Fold change ** | Fc (qRT-PCR) | C5.2         | Hb4a | Fold change | pValue    | pValue adj | C5.2       | Hb4a | Fold change | pValue    | pValue adj |
| ALDH2     | 14             | 0      | 14             | 41           | 20           | 0    | nd          | 1.89E-05  | 2.28E-04   | 18         | 0    | nd          | 5.61E-05  | 5.39E-04   |
| ALDOA     | 1919           | 458    | 4              | 1            | 492          | 83   | 4           | 2.13E-46  | 3.92E-44   | 406        | 72   | 4.1         | 5.47E-37  | 8.84E-35   |
| ANGPTL4   | 246            | 7      | 35             | 7            | 73           | 4    | 13          | 2.60E-13  | 1.02E-11   | 66         | 3    | 15.9        | 1.07E-12  | 3.93E-11   |
| ANXA6     | 13             | 0      | 13             | 2            | 21           | 0    | nd          | 1.10E-05  | 1.40E-04   | 18         | 0    | nd          | 5.61E-05  | 5.39E-04   |
| ATP5G3    | 685            | 14     | 49             | 2            | 254          | 8    | 23          | 4.99E-49  | 9.79E-47   | 205        | 8    | 18.5        | 3.54E-38  | 6.08E-36   |
| ATP5L     | 568            | 55     | 10             | 2            | 178          | 13   | 10          | 5.99E-28  | 5.99E-26   | 168        | 12   | 10.1        | 1.14E-26  | 1.12E-24   |
| C12orf44  | 146            | 14     | 10             | 2            | 33           | 2    | 11.9        | 1.83E-06  | 2.78E-05   | 29         | 2    | 10.5        | 1.27E-05  | 1.48E-04   |
| CAPG      | 720            | 96     | 8              | 1            | 161          | 16   | 7           | 2.21E-22  | 1.74E-20   | 143        | 14   | 7.4         | 3.54E-20  | 2.56E-18   |
| CDC20     | 392            | 89     | 4              | 1            | 100          | 18   | 4           | 4.04E-10  | 1.13E-08   | 82         | 16   | 3.7         | 5.07E-08  | 9.87E-07   |
| COL3A1    | 28             | 0      | 28             | 493          | 44           | 0    | nd          | 4.07E-11  | 1.28E-09   | 42         | 0    | nd          | 1.21E-10  | 3.51E-09   |
| COPE      | 170            | 27     | 6              | 1            | 104          | 8    | 9           | 1.40E-16  | 7.18E-15   | 102        | 6    | 12.3        | 9.22E-18  | 5.41E-16   |
| COX11     | 20             | 0      | 20             | 2            | 26           | 4    | 5           | 7.61E-04  | 5.78E-03   | 17         | 2    | 6.1         | 3.39E-03  | 1.80E-02   |
| COX4I1    | 562            | 14     | 40             | 2            | 181          | 9    | 15          | 5.63E-32  | 6.73E-30   | 148        | 7    | 15.3        | 1.01E-26  | 9.92E-25   |
| COX8A     | 1293           | 294    | 4              | 1            | 350          | 70   | 4           | 9.11E-29  | 9.64E-27   | 275        | 48   | 4.1         | 6.39E-26  | 5.84E-24   |
| CSDA      | 199            | 14     | 14             | 2            | 55           | 2    | 20          | 3.03E-11  | 9.70E-10   | 38         | 2    | 13.7        | 1.56E-07  | 2.80E-06   |
| DST       | 35             | 212    | -6             | 1            | 12           | 49   | -6          | 9.95E-10  | 2.70E-08   | 11         | 43   | -5.4        | 1.74E-08  | 3.72E-07   |
| EEF1A1    | 4781           | 96     | 50             | -1           | 2232         | 133  | 12          | 0.00E+00  | 0.00E+00   | 1857       | 123  | 10.9        | 1.26E-287 | 1.43E-283  |
| EEF1B2    | 263            | 48     | 5              | 1            | 181          | 83   | 2           | 2.85E-04  | 2.48E-03   | 154        | 79   | 1.4         | 7.29E-03  | 3.35E-02   |
| EIF4EBP1  | 199            | 41     | 5              | 1            | 46           | 10   | 3           | 1.15E-04  | 1.10E-03   | 45         | 8    | 4.1         | 2.61E-05  | 2.76E-04   |
| ERBB2IP   | 18             | 137    | -8             | 1            | 4            | 31   | -11         | 1.31E-08  | 2.91E-07   | 4          | 31   | -10.7       | 1.31E-08  | 2.86E-07   |
| FAU       | 158            | 14     | 11             | 1            | 66           | 3    | 16          | 1.07E-12  | 3.98E-11   | 55         | 3    | 13.2        | 2.52E-10  | 7.13E-09   |
| FBXL6     | 26             | 0      | 26             | 2            | 37           | 0    | nd          | 1.83E-09  | 4.79E-08   | 29         | 0    | nd          | 1.42E-07  | 2.55E-06   |
| GALNT3    | 6              | 267    | -45            | -2           | 2            | 53   | -37         | 5.14E-18  | 2.95E-16   | 2          | 45   | -31.1       | 3.93E-15  | 1.85E-13   |
| HMGA1     | 281            | 27     | 10             | 2            | 69           | 6    | 8           | 6.29E-11  | 1.92E-09   | 64         | 6    | 7.7         | 6.27E-10  | 1.67E-08   |
| HMGB1     | 556            | 82     | 7              | 2            | 203          | 25   | 6           | 7.35E-25  | 6.32E-23   | 195        | 24   | 5.9         | 6.00E-24  | 4.82E-22   |
| HMGB2     | 20             | 0      | 20             | 1            | 35           | 1    | 25          | 8.51E-08  | 1.65E-06   | 35         | 0    | nd          | 5.43E-09  | 1.26E-07   |
| HMG2      | 374            | 7      | 53             | 1            | 158          | 18   | 6           | 1.54E-20  | 1.13E-18   | 139        | 13   | 7.7         | 4.63E-20  | 3.26E-18   |
| HRAS      | 257            | 41     | 6              | 2            | 57           | 8    | 5           | 2.05E-07  | 3.78E-06   | 55         | 8    | 5.0         | 4.71E-07  | 7.66E-06   |
| HSPA8     | 544            | 75     | 7              | 4            | 181          | 30   | 4           | 2.56E-18  | 1.52E-16   | 168        | 26   | 4.7         | 5.37E-18  | 3.19E-16   |
| HSPE1     | 445            | 7      | 64             | 2            | 167          | 1    | 100         | 2.56E-38  | 3.88E-36   | 122        | 1    | 88.1        | 8.01E-28  | 8.40E-26   |
| IL6ST     | 6              | 226    | -38            | 1            | 884          | 48   | 13          | 7.96E-147 | 7.31E-144  | 1          | 37   | -51.2       | 2.45E-13  | 9.58E-12   |
| JUP       | 23             | 68     | -3             | 1            | 7            | 13   | -3          | 3.20E-02  | 1.16E-01   | 7          | 13   | -2.6        | 3.20E-02  | 1.05E-01   |
| KRT15     | 1129           | 164    | 7              | 3            | 274          | 34   | 6           | 7.13E-33  | 9.05E-31   | 238        | 32   | 5.4         | 2.26E-27  | 2.28E-25   |
| KRT19     | 9515           | 2345   | 4              | 2            | 2165         | 455  | 3           | 1.58E-160 | 2.33E-157  | 2064       | 427  | 3.5         | 1.00E-155 | 1.89E-152  |
| KRT4      | 14             | 0      | 14             | 52           | 23           | 2    | 8           | 2.19E-04  | 1.95E-03   | 22         | 2    | 7.9         | 3.49E-04  | 2.64E-03   |
| KRT6A     | 492            | 96     | 5              | 3            | 849          | 172  | 4           | 1.74E-66  | 4.66E-64   | 750        | 162  | 3.3         | 4.57E-55  | 1.23E-52   |
| KRT7      | 11141          | 2297   | 5              | 2            | 2845         | 465  | 4           | 1.86E-267 | 6.84E-264  | 2650       | 431  | 4.4         | 3.33E-250 | 1.88E-246  |
| LAMB1     | 105            | 540    | -5             | 1            | 37           | 127  | -5          | 2.17E-20  | 1.57E-18   | 29         | 111  | -5.3        | 1.94E-19  | 1.30E-17   |
| LAMC1     | 222            | 971    | -4             | 2            | 62           | 186  | -4          | 4.12E-26  | 3.67E-24   | 56         | 174  | -4.3        | 2.84E-25  | 2.51E-23   |
| LAMC2     | 146            | 608    | -4             | 1            | 40           | 127  | -4          | 3.34E-19  | 2.21E-17   | 34         | 115  | -4.7        | 2.09E-18  | 1.29E-16   |
| LMNA      | 339            | 48     | 7              | 2            | 115          | 10   | 8           | 2.35E-17  | 1.30E-15   | 98         | 9    | 7.9         | 1.18E-14  | 5.30E-13   |
| LOX       | 12             | 171    | -14            | -8           | 2            | 36   | -25         | 6.41E-12  | 2.20E-10   | 2          | 32   | -22.1       | 1.66E-10  | 4.78E-09   |
| LRPAP1    | 35             | 0      | 35             | 1            | 60           | 3    | 14          | 2.12E-11  | 6.87E-10   | 56         | 1    | 40.5        | 1.46E-12  | 5.26E-11   |
| MME       | 0              | 27     | -27            | -11          | 0            | 40   | nd          | 8.05E-16  | 3.96E-14   | 0          | 38   | nd          | 4.58E-15  | 2.13E-13   |
| NDUFA1    | 427            | 14     | 31             | 1            | 141          | 5    | 20          | 3.52E-27  | 3.34E-25   | 124        | 3    | 29.9        | 1.32E-25  | 1.18E-23   |
| NDUFA13   | 948            | 157    | 6              | 1            | 264          | 26   | 7           | 6.48E-36  | 8.99E-34   | 239        | 25   | 6.9         | 1.06E-31  | 1.36E-29   |
| NDUFA2    | 275            | 21     | 13             | 1            | 70           | 4    | 13          | 1.13E-12  | 4.21E-11   | 64         | 4    | 11.6        | 2.11E-11  | 6.74E-10   |
| NDUFA5    | 13             | 0      | 13             | 1            | 21           | 1    | 15          | 1.08E-04  | 1.04E-03   | 18         | 0    | nd          | 5.61E-05  | 5.39E-04   |
| NDUFB3    | 23             | 0      | 23             | 2            | 88           | 2    | 32          | 1.20E-18  | 7.44E-17   | 37         | 1    | 26.7        | 3.02E-08  | 6.14E-07   |
| NDUFB8    | 1001           | 123    | 8              | 2            | 246          | 23   | 8           | 2.13E-34  | 2.90E-32   | 228        | 21   | 7.8         | 3.30E-32  | 4.29E-30   |
| NDUFS7    | 334            | 14     | 24             | 1            | 72           | 2    | 26          | 4.89E-15  | 2.25E-13   | 65         | 2    | 23.5        | 1.81E-13  | 7.17E-12   |
| NDUFS8    | 211            | 41     | 5              | 1            | 89           | 13   | 5           | 1.39E-10  | 4.06E-09   | 70         | 11   | 4.6         | 3.19E-08  | 6.46E-07   |
| PDS5B     | 0              | 26     | -26            | 1            | 1            | 34   | -47         | 3.07E-12  | 1.09E-10   | 0          | 29   | nd          | 1.14E-11  | 3.80E-10   |
| PFKP      | 749            | 123    | 6              | 4            | 190          | 30   | 5           | 7.26E-20  | 4.97E-18   | 167        | 24   | 5.0         | 7.84E-19  | 5.10E-17   |
| PHB       | 492            | 75     | 7              | 3            | 133          | 16   | 6           | 5.21E-17  | 2.79E-15   | 123        | 15   | 5.9         | 1.02E-15  | 5.02E-14   |
| PHB2      | 4166           | 827    | 5              | 3            | 989          | 156  | 5           | 1.08E-96  | 4.80E-94   | 895        | 146  | 4.4         | 2.43E-85  | 1.20E-82   |
| PTMA      | 46             | 0      | 46             | 1            | 99           | 2    | 36          | 3.80E-21  | 2.82E-19   | 92         | 2    | 33.2        | 1.48E-19  | 1.00E-17   |
| PTMS      | 427            | 14     | 31             | 1            | 145          | 6    | 17          | 4.88E-27  | 4.57E-25   | 122        | 4    | 22.0        | 4.98E-24  | 4.03E-22   |
| RAN       | 351            | 21     | 17             | 2            | 103          | 7    | 11          | 3.78E-17  | 2.06E-15   | 94         | 7    | 9.7         | 2.76E-15  | 1.31E-13   |
| RPL10A    | 2949           | 595    | 5              | 1            | 910          | 116  | 6           | 1.27E-103 | 6.01E-101  | 849        | 112  | 5.5         | 1.15E-94  | 5.90E-92   |
| RPL29     | 1229           | 533    | 2              | 2            | 906          | 496  | 1           | 2.83E-07  | 5.07E-06   | 816        | 446  | 1.3         | 9.23E-07  | 1.41E-05   |
| RPL31     | 152            | 14     | 11             | 2            | 76           | 8    | 7           | 5.47E-11  | 1.69E-09   | 49         | 5    | 7.1         | 1.27E-07  | 2.30E-06   |
| RPL38     | 1006           | 96     | 10             | 1            | 442          | 32   | 10          | 1.97E-67  | 5.56E-65   | 384        | 20   | 13.9        | 2.03E-65  | 7.65E-63   |
| RPL39     | 1375           | 321    | 4              | 2            | 333          | 98   | 2           | 4.02E-17  | 2.17E-15   | 269        | 67   | 2.9         | 1.01E-17  | 5.85E-16   |
| RPL41     | 1042           | 21     | 50             | 2            | 768          | 72   | 8           | 6.57E-104 | 3.22E-101  | 667        | 50   | 9.6         | 1.30E-99  | 7.34E-97   |
| RPL8      | 1691           | 48     | 35             | 3            | 488          | 9    | 39          | 9.86E-101 | 4.53E-98   | 463        | 5    | 66.9        | 9.86E-101 | 6.20E-98   |
| RPLP1     | 2475           | 41     | 60             | 2            | 912          | 31   | 21          | 6.97E-170 | 1.14E-166  | 859        | 22   | 28.2        | 2.06E-168 | 4.66E-165  |
| RPS13     | 860            | 103    | 8              | 1            | 319          | 78   | 3           | 3.40E-21  | 2.54E-19   | 296        | 59   | 3.6         | 1.17E-24  | 9.77E-23   |
| RPS15A    | 714            | 68     | 11             | 1            | 435          | 34   | 9           | 1.88E-64  | 4.70E-62   | 377        | 27   | 10.1        | 5.62E-58  | 1.67E-55   |
| RPS19     | 6267           | 1306   | 5              | 1            | 1630         | 282  | 4           | 1.50E-146 | 1.30E-143  | 1462       | 220  | 4.8         | 2.05E-147 | 2.57E-144  |
| RPS24     | 363            | 62     | 6              | 2            | 135          | 18   | 5           | 3.01E-16  | 1.51E-14   | 119        | 12   | 7.2         | 8.57E-17  | 4.54E-15   |
| RPS27A    | 35             | 0      | 35             | 1            | 337          | 7    | 35          | 6.16E-69  | 1.78E-66   | 320        | 7    | 33.0        | 4.49E-65  | 1.59E-62   |
| RPS6      | 170            | 7      | 24             | 1            | 64           | 1    | 46          | 2.14E-14  | 9.40E-13   | 60         | 1    | 43.3        | 1.77E-13  | 7.04E-12   |
| SEMA3C    | 25             | 0      | 25             | 1            | 1            | 34   | -47         | 3.07E-12  | 1.09E-10   | 0          | 27   | nd          | 6.48E-11  | 1.95E-09   |
| SFN       | 374            | 7      | 53             | 1            | 93           | 2    | 34          | 8.80E-20  | 5.96E-18   | 79         | 1    | 57.1        | 7.52E-18  | 4.43E-16   |
| SLC3A2    | 257            | 21     | 12             | 3            | 83           | 10   | 6           | 4.06E-11  | 1.28E-09   | 71         | 8    | 6.4         | 5.02E-10  | 1.37E-08   |
| SOS2      | 6              | 301    | -50            | 1            | 9            | 72   | -11         | 1.45E-18  | 8.80E-17   | 6          | 61   | -14.1       | 3.93E-17  | 2.15E-15   |
| SOX15     | 15             | 0      | 15             | 1            | 26           | 0    | nd          | 7.24E-07  | 1.21E-05   | 25         | 0    | nd          | 1.25E-06  | 1.82E-05   |
| STAT3     | 64             | 390    | -6             | 1            | 18           | 82   | -6          | 2.32E-16  | 1.18E-14   | 16         | 72   | -6.2        | 1.93E-14  | 8.45E-13   |
| TGFBR3    | 6              | 246    | -41            | 1            | 7            | 42   | -8          | 3.06E-10  | 8.66E-09   | 4          | 35   | -12.1       | 6.29E-10  | 1.67E-08   |
| TIMP1     | 357            | 7      | 51             | 2            | 87           | 3    | 21          | 2.58E-17  | 1.42E-15   | 81         | 2    | 29.3        | 4.60E-17  | 2.49E-15   |
| TPI1      | 930            | 34     | 27             | 2            | 444          | 57   | 6           | 3.45E-51  | 7.04E-49   | 424        | 56   | 5.5         | 4.43E-48  | 1.12E-45   |
| TUBB2C    | 568            | 41     | 14             | 2            | 162          | 12   | 10          | 1.97E-25  | 1.74E-23   | 140        | 10   | 10.1        | 1.88E-22  | 1.46E-20   |
| TXNIP     | 275            | 2639   | -10            | -3           | 75           | 539  | -10         | 3.20E-124 | 2.14E-121  | 68         | 462  | -9.4        | 3.03E-104 | 2.45E-101  |
| TXNRD2    | 146            | 14     | 10             | 2            | 39           | 4    | 7           | 2.72E-06  | 3.97E-05   | 29         | 1    | 21.0        | 1.87E-06  | 2.63E-05   |
| UCRC      | 30             | 0      | 30             | 2            | 57           | 0    | nd          | 3.46E-14  | 1.50E-12   | 54         | 0    | nd          | 1.77E-13  | 7.04E-12   |
| UQCRB     | 556            | 34     | 16             | 2            | 207          | 7    | 21          | 1.13E-39  | 1.83E-37   | 196        | 3    | 47.2        | 4.95E-42  | 1.02E-39   |
| VEGFA     | 23             | 185    | -8             | 1            | 9            | 35   | -5          | 4.00E-07  | 6.95E-06   | 8          | 33   | -5.7        | 5.21E-07  | 8.41E-06   |
